# Supplementary material for: Enrichment of SOX2-Positive Cells in BRAF V600E Mutated and Recurrent Ameloblastoma
Source: MDPI journal article supplement (doi:10.3390/jpm12010077), 2022-01-08
Supplement: s1 [file s1]

## Supplementary Materials

### Enrichment of SOX2-Positive Cells in Ameloblastoma Patients with Tumor Recurrence and BRAF V600E Mutated Cases

Chih-Huang Tseng <sup>1,2,3</sup>, Pei Hsuan Lu <sup>4</sup>, Yi-Ping Wang <sup>3,4,5</sup>  
and Julia Yu Fong Chang <sup>3,4,5,\*</sup>

<sup>1</sup> Division of Oral Pathology & Maxillofacial Radiology, Department of Dentistry, Kaohsiung Medical University Hospital, Kaohsiung, Taiwan; 1050565@kmuh.org.tw

<sup>2</sup> Oral & Maxillofacial Imaging Center, College of Dental Medicine, Kaohsiung Medical University, Kaohsiung, Taiwan

<sup>3</sup> Graduate Institute of Clinical Dentistry, School of Dentistry, National Taiwan University, Taipei, Taiwan; ypwang0530@ntu.edu.tw

<sup>4</sup> Department of Dentistry, National Taiwan University Hospital, College of Medicine, National Taiwan University, Taipei, Taiwan; R04422025@ntu.edu.tw

<sup>5</sup> Graduate Institute of Oral Biology, School of Dentistry, National Taiwan University, Taipei, Taiwan; jyfchang@ntu.edu.tw

\* Correspondence: jyfchang@ntu.edu.tw

**Table S1.** Primers used in targeted DNA sequencing and real-time RT-PCR*DNA sequencing*

| Primer name | Sequences (5' to 3')   |
|-------------|------------------------|
| BRAF-ex15F  | TGCTTGCTCTGATAGGAAAATG |
| BRAF-ex15R  | AGCATCTCAGGGCCAAAAAT   |

*Real-time RT-PCR*

| Primer name    | Sequences (5' to 3')    |
|----------------|-------------------------|
| hBRAF(V600E)-F | ATTGCACGACAGACTGCAC     |
| hBRAF(V600E)-R | CCCACTCCATCGAGATTTCT    |
| hSOX2-F        | GCTACAGCATGATGCAGGACCA  |
| hSOX2-R        | GCGAGCTGGTCATGGAGTT     |
| GAPDH-F        | GCACCGTCA AGGCTG AGA AC |
| GAPDH-R        | TGGTGGTGA AGACGCCAGT    |

**Table S2.** Correlation between the expression statuses of SOX2 and Ki-67.

| Histologic type | <i>p</i> <sup>a</sup> |
|-----------------|-----------------------|
| Follicular type | 0.324                 |
| Plexiform type  | 0.501                 |
| Unicystic type  | 0.103                 |

<sup>a</sup>Spearman's correlation coefficient.**Table S3.** Correlation of expression status of SOX2 and Ki-67 with clinical parameters<sup>a</sup>.

| Histologic Type | Marker Expressed | Clinical parameters |                 |                  |
|-----------------|------------------|---------------------|-----------------|------------------|
|                 |                  | Size of lesion      | Root resorption | Bone perforation |
| Follicular type | SOX2             | <i>p</i> =0.336     | <i>p</i> =0.731 | <i>p</i> =0.837  |
|                 | Ki-67            | <i>p</i> =0.490     | <i>p</i> =0.298 | <i>p</i> =0.261  |
| Plexiform type  | SOX2             | <i>p</i> =0.207     | <i>p</i> =0.663 | <i>p</i> =0.968  |
|                 | Ki-67            | <i>p</i> =0.652     | <i>p</i> =0.843 | <i>p</i> =0.904  |
| Unicystic type  | SOX2             | <i>p</i> =0.840     | <i>p</i> =0.483 | <i>p</i> =0.245  |
|                 | Ki-67            | <i>p</i> =0.223     | <i>p</i> =0.151 | <i>p</i> =0.785  |

<sup>a</sup>Spearman's correlation coefficient.

**Table S4.** Correlation of size of lesion to root resorption and bone perforation in three types of ameloblastoma<sup>a</sup>.

| Histologic type |                | Root resorption | Bone perforation |
|-----------------|----------------|-----------------|------------------|
| Follicular type | Size of lesion | $p=0.891$       | $p=0.441$        |
| Plexiform type  | Size of lesion | $p=0.636$       | $p=0.053$        |
| Unicystic type  | Size of lesion | $p=0.562$       | $p=0.703$        |

<sup>a</sup> Spearman's correlation coefficient.

**Table S5.** Comparison of expression status of SOX2 and Ki-67 in recurrent lesions<sup>a</sup>.

| Histologic type | Case number     | Labeling indices of SOX2 (%) | Labeling indices of Ki-67 (%) | Comparing SOX2 expression status with other cases without recurrent event in the same type | Comparing Ki-67 expression status with other cases without recurrent event in the same type |
|-----------------|-----------------|------------------------------|-------------------------------|--------------------------------------------------------------------------------------------|---------------------------------------------------------------------------------------------|
| Follicular type | AB-3            | 42.7                         | 1.3                           |                                                                                            |                                                                                             |
|                 | AB-6            | 38.4                         | 1.2                           |                                                                                            |                                                                                             |
|                 | AB-7            | 2.8                          | 1.7                           |                                                                                            |                                                                                             |
|                 | AB-8            | 4                            | 1.0                           |                                                                                            |                                                                                             |
|                 | AB-12           | 4                            | 0.6                           |                                                                                            |                                                                                             |
|                 | AB-14           | 6.2                          | 2.0                           |                                                                                            |                                                                                             |
|                 | AB-16           | 2.2                          | 7.2                           |                                                                                            |                                                                                             |
|                 | AB-25           | 58.2                         | 5.4                           |                                                                                            |                                                                                             |
|                 | AB-26           | 7.2                          | 3.0                           |                                                                                            |                                                                                             |
|                 | Mean ± S.D. (%) | 18.4 ± 21.7                  | 2.6 ± 2.3                     | $p=0.958$                                                                                  | $p=0.916$                                                                                   |
| Plexiform type  | AB-31           | 27.4                         | 2.6                           |                                                                                            |                                                                                             |
|                 | AB-33           | 62.7                         | 8.0                           |                                                                                            |                                                                                             |
|                 | AB-37           | 41.7                         | 2.6                           |                                                                                            |                                                                                             |
|                 | Mean ± S.D. (%) | 43.9 ± 17.8                  | 4.4 ± 3.1                     | $p=0.258$                                                                                  | $p=0.765$                                                                                   |

|                           |       |             |     |   |   |
|---------------------------|-------|-------------|-----|---|---|
|                           |       | S.D.<br>(%) |     |   |   |
| <b>Unicystic<br/>type</b> | AB-59 | 8.5         | 5.5 | - | - |

<sup>a</sup> Mann-Whitney U test.

**Table S6.** Comparison of expression status of SOX2 and Ki-67 in cases with further recurrent lesions<sup>a</sup>.

| <b>Histologic<br/>type</b> | <b>Case<br/>number</b> | <b>Labeling<br/>indices of<br/>SOX2 (%)</b> | <b>Labeling<br/>indices of<br/>Ki-67 (%)</b> | <b>Comparing<br/>SOX2<br/>expression<br/>status with<br/>other cases<br/>without<br/>recurrent<br/>event in the<br/>same type</b> | <b>Comparing<br/>Ki-67<br/>expression<br/>status with<br/>other cases<br/>without<br/>recurrent<br/>event in the<br/>same type</b> |
|----------------------------|------------------------|---------------------------------------------|----------------------------------------------|-----------------------------------------------------------------------------------------------------------------------------------|------------------------------------------------------------------------------------------------------------------------------------|
| <b>Follicular<br/>type</b> | AB-16                  | 2.2                                         | 7.2                                          |                                                                                                                                   |                                                                                                                                    |
|                            | AB-19                  | 26.5                                        | 2.2                                          |                                                                                                                                   |                                                                                                                                    |
|                            | AB-25                  | 58.2                                        | 5.4                                          |                                                                                                                                   |                                                                                                                                    |
|                            | Mean ±<br>S.D.<br>(%)  | 29.0 ± 28.1                                 | 5.8 ± 3.9                                    | <i>p</i> =0.546                                                                                                                   | <i>p</i> =0.146                                                                                                                    |
|                            |                        |                                             |                                              |                                                                                                                                   |                                                                                                                                    |
| <b>Plexiform<br/>type</b>  | AB-31                  | 27.4                                        | 2.6                                          |                                                                                                                                   |                                                                                                                                    |
|                            | AB-37                  | 41.7                                        | 2.6                                          |                                                                                                                                   |                                                                                                                                    |
|                            | AB-39                  | 15.0                                        | 2.9                                          |                                                                                                                                   |                                                                                                                                    |
|                            | AB-43                  | 9.1                                         | 1.9                                          |                                                                                                                                   |                                                                                                                                    |
|                            | Mean ±<br>S.D.<br>(%)  | 23.3 ± 14.4                                 | 2.5 ± 0.4                                    | <i>p</i> =0.763                                                                                                                   | <i>p</i> =0.635                                                                                                                    |

<sup>a</sup> Mann-Whitney U test.

**Table S7.** Comparison of expression status of SOX2 and Ki-67 in mural type and luminal/intra-luminal type unicystic ameloblastomas<sup>a</sup>.

| Subtypes of unicystic ameloblastoma | SOX2 expression status | Ki-67 expression status |
|-------------------------------------|------------------------|-------------------------|
| Mural type                          | $p=0.452$              | $p=0.971$               |
| Intra-luminal/luminal type          |                        |                         |

<sup>a</sup> Mann-Whitney U test.

**Table S8.** Comparison of expression status of SOX2 and Ki-67 in intra-luminal/luminal type and other types of ameloblastomas<sup>a</sup>.

| Histologic type            | Sox2 expression status<br>Mean $\pm$ S.D. (%) | $p$   | Ki-67 expression status<br>Mean $\pm$ S.D. (%) | $p$   |
|----------------------------|-----------------------------------------------|-------|------------------------------------------------|-------|
| Intra-luminal/luminal type | 13.5 $\pm$ 9.5                                | 0.653 | 2.8 $\pm$ 2.3                                  | 0.809 |
| Other types                | 22.2 $\pm$ 21.0                               |       | 3.2 $\pm$ 2.7                                  |       |

<sup>a</sup> Mann-Whitney U test.

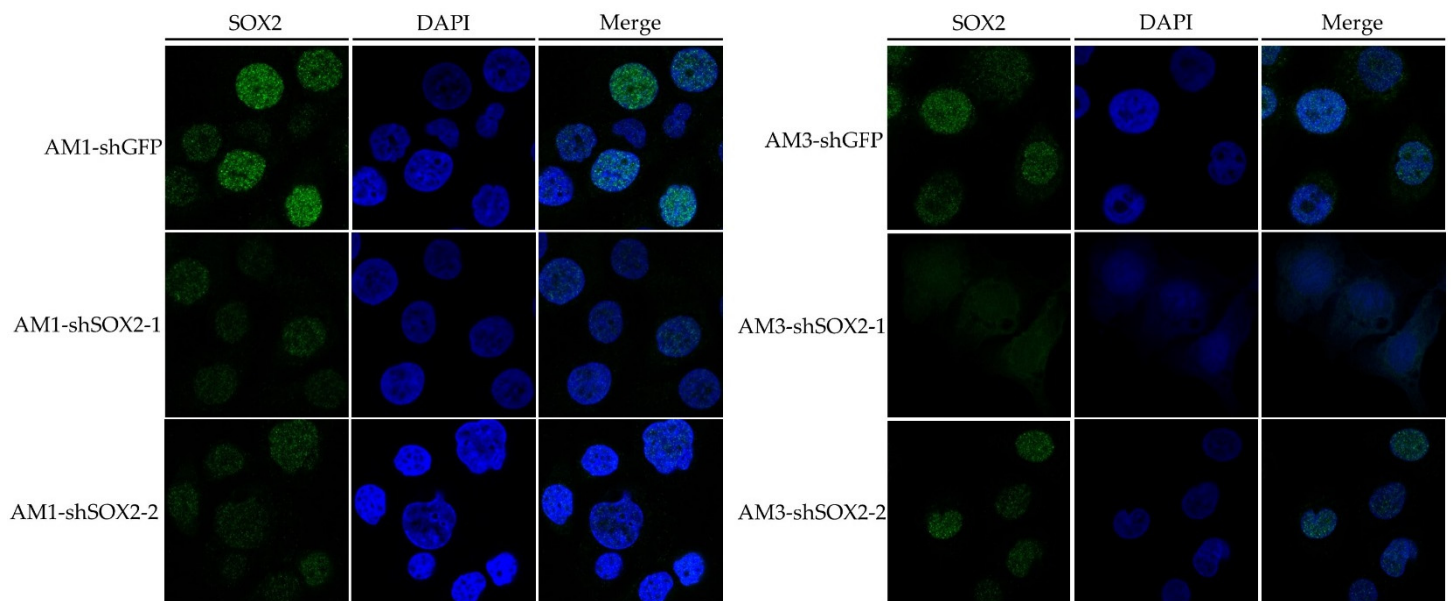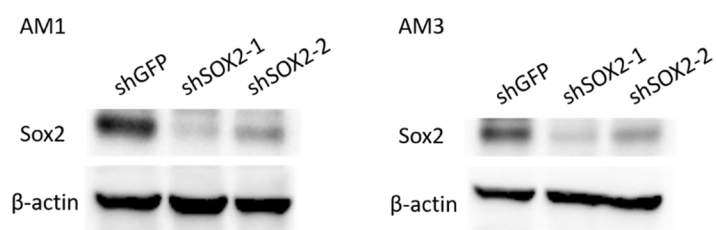

**Figure S1.** Knockdown efficiency of SOX2 in ameloblastoma cell lines.

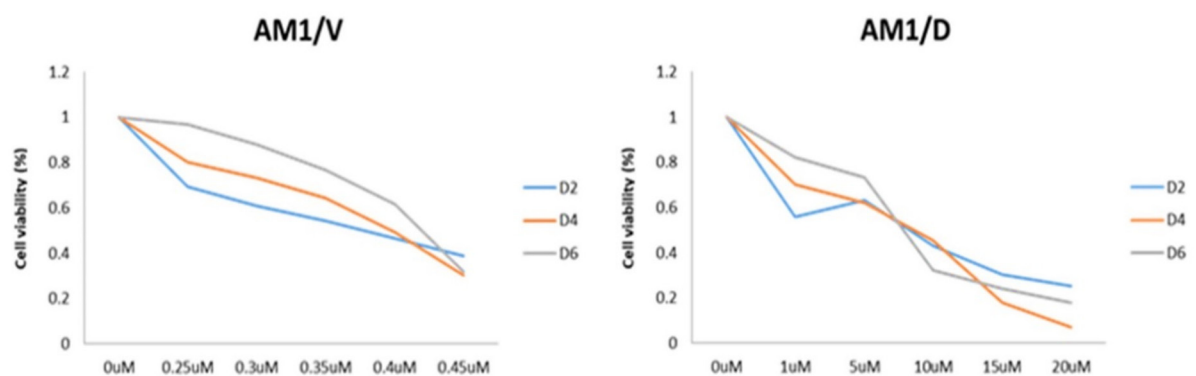

**Figure S2.** Inhibition of BRAF reduces cell viability of AM1 cells. AM1 cell was treated with BRAF inhibitors (**V**: vemurafenib; **D**: dabrafenib) for 2, 4 and 6 days then analysis the cell viability.
